# Supplementary material
Source: PubMed Central journal article supplement (PMC4153841)
Supplement: 14_130_El-Hamoly.Suppl.pdf [file 14_130_El-Hamoly.Suppl.pdf]

Supplemental Data

Activation of Poly(ADP-Ribose) Polymerase-1 Delays Wound Healing by Regulating Keratinocyte Migration and Production of Inflammatory Mediators

Tarek El-Hamoly,<sup>1,2,3\*</sup> Csaba Hegedűs,<sup>1\*</sup> Petra Lakatos,<sup>1</sup> Katalin Kovács,<sup>1,4</sup> Péter Bai,<sup>1,5,6</sup> Mona A El-Ghazaly,<sup>2</sup> Ezzeddin S El-Denshary,<sup>3</sup> Éva Szabó,<sup>7</sup> and László Virág<sup>1,4</sup>

Online address: <http://www.molmed.org>

The Feinstein Institute  
for Medical Research North  
Shore LIJ  
Empowering Imagination. Pioneering Discovery.®

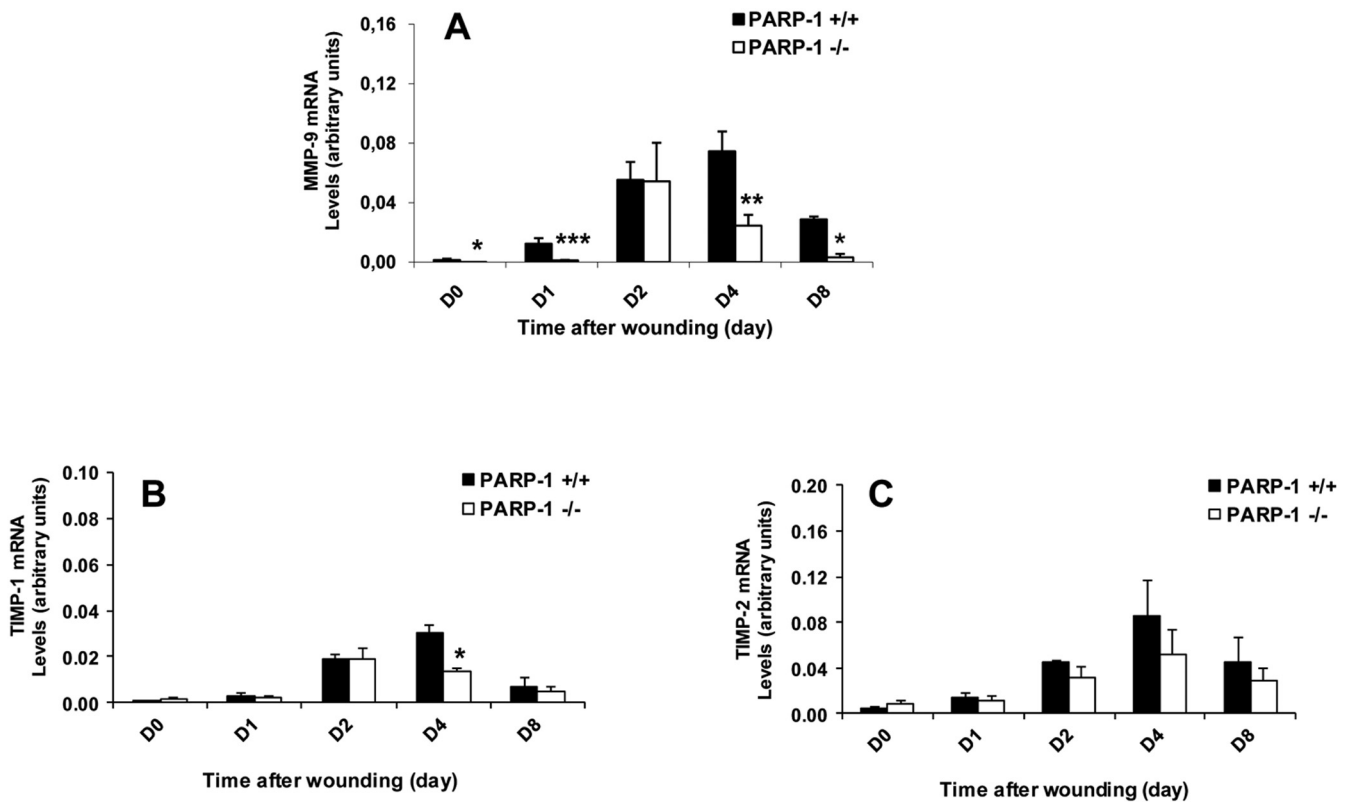

Supplementary Figure S1. Gene expression of selected wound healing factors was estimated by means of RT-qPCR (in both PARP-1<sup>+/+</sup> and PARP-1<sup>-/-</sup> mice). Values normalized to GAPDH are presented as mean ± S.E.M. of six samples. ( $P < 0.05$ ,  $**P < 0.01$ ,  $***P < 0.001$ )

Supplementary Table S1. List of primers.

| Gene          | Primer sequence                   |
|---------------|-----------------------------------|
| COX-2         | 5' GTGAAGGGAAATAAGGAGCTTCC        |
|               | 5' GTGATTTAAGTCCACTCCATGGC        |
| GAPDH         | 5' CAAGGTCATCCATGACAACCTTG        |
|               | 5' GGCCATCCACAGTCTTCTGG           |
| IL-1 $\beta$  | 5' CAACCAACAAGTGATATTCTCCATG      |
|               | 5' GATCCACACTCTCCAGCTGCA          |
| IL-6          | 5' GAGGATACCACTCCCAACAGACC        |
|               | 5' AAGTGCATCATCGTTGTTCAACA        |
| iNOS          | 5' GAAGTGCAAAGTCTCAGACATGG        |
|               | 5' GATTCTGGAACATTCTGTGCTGTC       |
| MIP-2         | 5' CTCCAGCCACACTTCAGCCTAG         |
|               | 5' CGTCACACTCAAGCTCTGGATG         |
| MMP-9         | 5' CATTGCGTGGATAAGGAGT            |
|               | 5' ACCTGGTTCACCTCATGGTC           |
| PARP-1        | 5' GGAGCTGCTCATCTCAACC            |
|               | 5' GCAGTGACATCCCCAGTACA           |
| PARP-2        | 5' GGAAGGCGAGTGCTAAATGAA          |
|               | 5' AAGGTCTTCACAGAGTCTCGATTG       |
| TIMP-1        | 5' ATTCAAGGCTGTGGGAAATG           |
|               | 5' AAGAAGCTGCAGGCATTGAT           |
| TIMP-2        | 5' CGTTTCTTTGGGGTTTCTGA           |
|               | 5' TTTATCACTAACAATATAGACAGCCACTCT |
| TNF- $\alpha$ | 5' CATCTTCTCAAAATTCGAGTGACAA      |
|               | 5' TGGGAGTAGACAAGGTACAACCC        |
